# Supplementary material for: Determination of cow's milk β-lactoglobulin allergens in foods based on a rapid and sensitive immunochromatographic test strip method
Source: Research Square preprint supplement (doi:10.21203/rs.3.rs-7097441/v1), 2025-07-22
Supplement: Supplementary file 1 [file a1a44cb890f16f83c172d1cb.docx]

**Supplementary Material**

**Determination of cow's milk β-lactoglobulin allergens in foods based on a rapid and sensitive immunochromatographic test strip method**

Yang Wan a, Wenhan Kang a, Jincheng Han a, Jiukai Zhang a, Ning Yu a, *, Ying Chen a, *

a Chinese Academy of Quality and Inspection & Testing, Beijing, 100176, People's Republic of China

* **Corresponding author:**

Ying Chen

Tel (Fax): +86-10-53897910

Email: chenyingcaiq@163.com

**
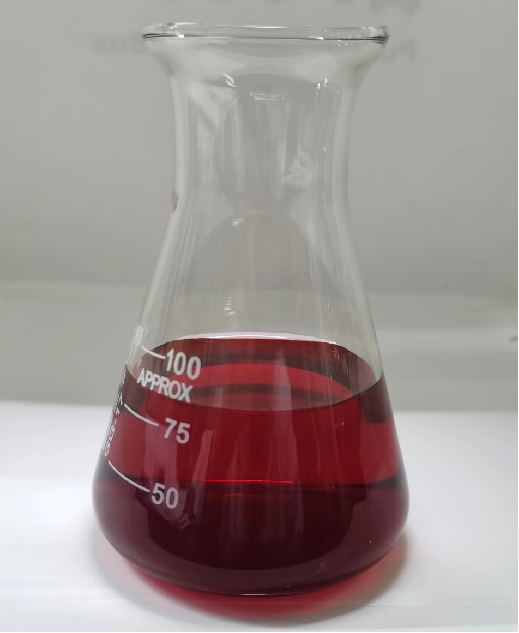
**

**Fig. S1** Colloidal gold solutions synthesized by reduction of chloroauric acid with trisodium citrate.


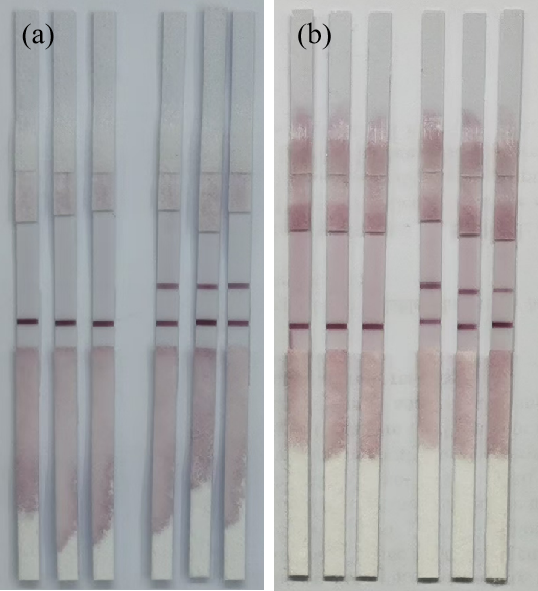


**Fig. S2** Storage stability of immunochromatographic test strips (a) 0 days. (b) 100 days.
